## CORRECTION

# Correction: Prdm16 is crucial for progression of the multipolar phase during neural differentiation of the developing neocortex

**Mayuko Inoue, Ryota Iwai, Hidenori Tabata, Daijiro Konno, Mariko Komabayashi-Suzuki, Chisato Watanabe, Hiroko Iwanari, Yasuhiro Mochizuki, Takao Hamakubo, Fumio Matsuzaki, Koh-ichi Nagata and Ken-ichi Mizutani**

There was an error published in Development **144**, 385-399.

In the data availability section, the accession information for the microarray data was incomplete. The full information is as follows: Microarray data have been deposited at ArrayExpress under accession numbers E-MTAB-5438 and E-MTAB-5646.

The authors apologise to readers for this mistake.
